# Supplementary material for: Tubacin, an HDAC6 Selective Inhibitor, Reduces the Replication of the Japanese Encephalitis Virus via the Decrease of Viral RNA Synthesis
Source: MDPI journal article supplement (doi:10.3390/ijms18050954), 2017-05-01
Supplement: s1 [file s1]

# Tubacin, an HDAC6 Selective Inhibitor, Reduces the Replication of the Japanese Encephalitis Virus via the Decrease of Viral RNA Synthesis

Chien-Yi Lu, Yi-Chih Chang, Chun-Hung Hua, Chieh Chuang, Su-Hua Huang, Szu-Hao Kung, Mann-Jen Hour and Cheng-Wen Lin

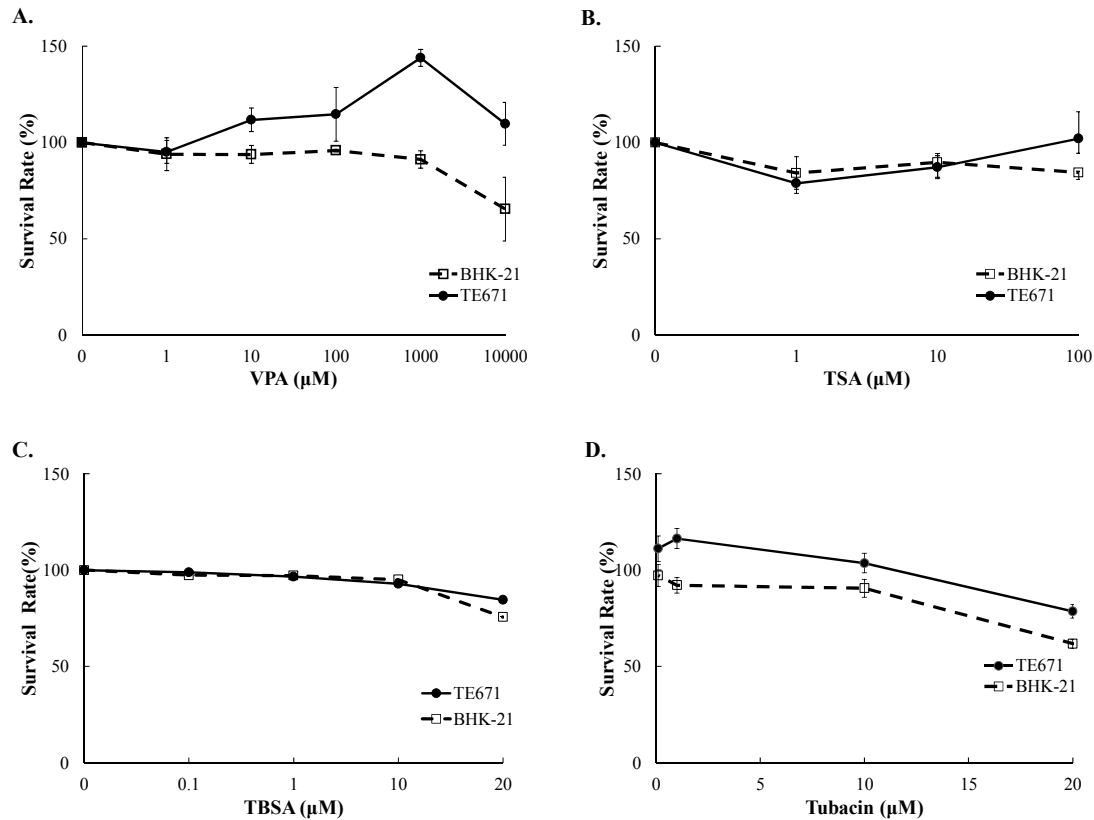

**Figure S1.** Survival rate of TE671 and BHK-21 cells treated with pan-HDAC and selective HDAC6 inhibitors. Cells were cultured in 96-well plates, treated with VPA (A), TSA (B), TBSA (C), and tubacin (D), respectively. After 48 h incubation, the assay was followed by MTT assay. Survival rates of cells were determined as the ratio of OD<sub>570–630 nm</sub> of treated cells to OD<sub>570–630 nm</sub> of untreated cells.

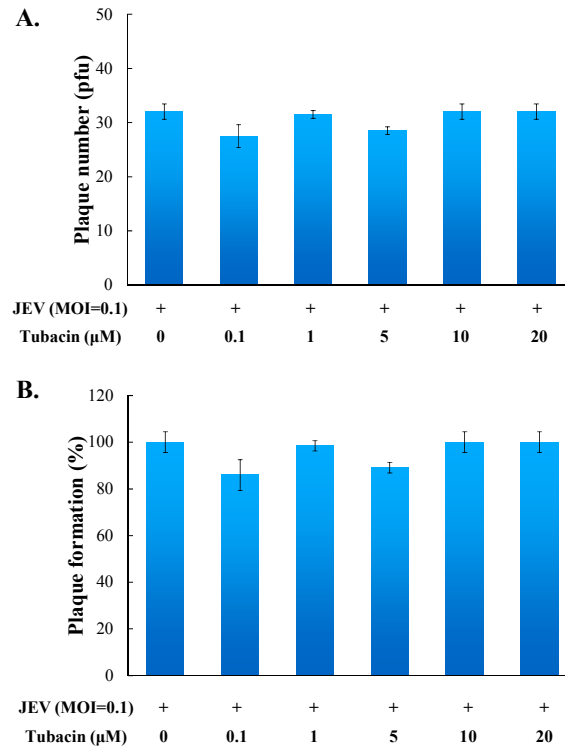

**Figure S2.** Attachment inhibitory activities of tubacin against JEV. JEV (50 pfu) was mixed with tubacin, and then immediately added onto TE671 cell monolayer. After 1-h incubation at 4 °C, cell monolayer was washed twice with PBS, and then overlaid with 2 mL of a methylcellulose medium for 3 days at 37 °C in CO<sub>2</sub>. After staining with naphthol blue-black dye, residual plaques were counted (**A**). Relative percentage of plaque formation was shown based on the ratio of plaque number of each tubacin-treated group to that of mock-treated control (**B**).

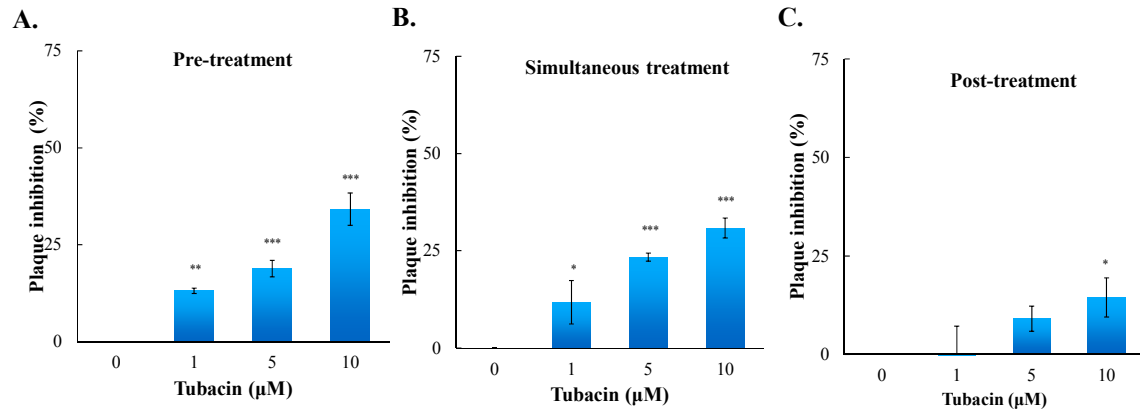

**Figure S3.** Time-of-addition assays for analysis of antiviral action modes of tubacin against JEV. Infected cells were treated with tubacin 1 h prior (pre) (A), simultaneous (B), or 1 h post infection (C), and then followed by plaque assay. Plaque inhibition was calculated from ratio of treated group to mock-treated control. \*,  $p$  value < 0.05; \*\*,  $p$  value < 0.01; \*\*\*,  $p$  value < 0.001 compared with untreated cells.
